# Supplementary material
Source: publisher site journal article supplement (https://www.dovepress.com/article/292166)
Supplement: Supplementary file 1 [file 292166-revised-supplementary-table-1.pdf › 292166-revised-supplementary-table-1.pdf]

Supplemental Table 1: Sample Characteristics

|                  |                                         | <b>Sample<br/>(n=114)</b> |
|------------------|-----------------------------------------|---------------------------|
| <b>Gender</b>    | Man                                     | 52 (46%)                  |
|                  | Woman                                   | 61 (54%)                  |
|                  | Prefer not to say                       | 1 (1%)                    |
| <b>Race</b>      | White                                   | 86 (75%)                  |
|                  | Black or African-American               | 6 (5%)                    |
|                  | Asian                                   | 18 (16%)                  |
|                  | Other                                   | 7 (6%)                    |
| <b>Ethnicity</b> | Hispanic, Latino, or Spanish origin     | 8 (7%)                    |
|                  | Not Hispanic, Latino, or Spanish origin | 106 (93%)                 |
