# Supplementary material
Source: publisher site journal article supplement (https://www.dovepress.com/article/292166)
Supplement: Supplementary file 2 [file 292166-revised-supplementary-table-2.pdf › 292166-revised-supplementary-table-2.pdf]

Supplemental Table 2. Representative Free Text Responses

|                                      | Women                                                                                                                                                                                               | Men                                                                                                                                                                                                       |
|--------------------------------------|-----------------------------------------------------------------------------------------------------------------------------------------------------------------------------------------------------|-----------------------------------------------------------------------------------------------------------------------------------------------------------------------------------------------------------|
| <b>Role Misidentification</b>        | “Patients and other healthcare professionals assume I am a role other [than] that [of] a physician.”                                                                                                | “I certainly observed several occasions in which a female resident colleague was assumed to not be a physician by a patient.”                                                                             |
|                                      | “Patients think I am the nurse, nutritionist, phlebotomy, etc.”                                                                                                                                     | “A number of my female MD resident colleagues are addressed as a nurse, pharmacist, or phlebotomist by patients.”                                                                                         |
|                                      | “A patient told me that he would not listen to what I said because he wanted to speak to his real doctor.”                                                                                          | “Predominately patients' subconscious biases against women and people of color, for example addressing me (a white male) as the intern rather than my female attending when asking about care decisions.” |
| <b>Difficult Working Environment</b> | “I very frequently have my medical competency, decision making, and/or the very fact that I am a doctor questioned or doubted by patients, nurses, ancillary staff, and several interns.”           | “I've seen female residents not receive the same level of respect as male residents.”                                                                                                                     |
|                                      | “More interruptions and questioning being the female intern compared to my male co-intern.”                                                                                                         | “I've seen sexually inappropriate comments made to both male and female doctors.”                                                                                                                         |
|                                      | “I think my male colleagues are starting from a place where they are assumed to be more competent/know more; I think as a female you're always having to work harder to prove that you're as good.” | “Saw my senior resident face a lot of pushback regarding a particular management issue in the ICU. When I proposed the exact same thing, I obtained no pushback.”                                         |
|                                      | “Having to formally establish my role/authority in the situation.”                                                                                                                                  | “Female residents often treated differently by providers/staff and patients.”                                                                                                                             |
